# Supplementary material for: Position-selective intramolecular aromatic C–H bond activation of 1,2,3-triazol-5-ylidene (tzNHC) ligands in (p-cymene)ruthenium(ii) complexes
Source: Royal Society of Chemistry journal article supplement (doi:10.1039/c2dt32368k), 2012-11-30
Supplement: c2dt32368k.pdf [file c2dt32368k.pdf]

## Electronic Supplementary Information

### Position-Selective Intramolecular Aromatic C-H Bond Activation of 1,2,3-Triazol-5-ylidene (tzNHC)

#### Ligands in (*p*-Cymene)Ruthenium(II) Complexes

Kenichi Ogata, Sayuri Inomata and Shin-ichi Fukuzawa\*

*Department of Applied Chemistry, Institute of Science and Engineering, Chuo University*

*1-13-27 Kasuga, Bunkyo-ku, Tokyo 112-8551, Japan*

### Contents

|                                               |       |
|-----------------------------------------------|-------|
| 1. Experimental procedures                    | S2-S6 |
| 1.1 General procedures                        | S2    |
| 1.2 Synthesis of triazole and triazolium salt | S2-S3 |
| 1.3 Synthesis of ruthenium NHC complexes      | S4-S6 |
| 2. X-ray Crystallographic data                | S7    |
| 3. References                                 | S7    |

## 1. Experimental Procedures

### 1.1 General Procedures

All manipulations involving air- and moisture-sensitive organometallic compounds were carried out under a nitrogen atmosphere by using a standard Schlenk tube or high vacuum techniques.  $\text{CH}_2\text{Cl}_2$  was distilled over calcium hydride under nitrogen atmosphere prior to use. THF was distilled over sodium-benzophenone under nitrogen atmosphere prior to use. 2,6-dimethyl phenyl azide,<sup>1</sup> 2-methyl phenyl azido,<sup>2</sup> **1a**,<sup>3</sup> **1d**<sup>4</sup> were prepared according to literature procedures. Other reagents employed in this research were commercially available and used without further purification. Column chromatography was performed on silica gel (spherical, 60  $\mu\text{m}$ ) and alumina (spherical, 75  $\mu\text{m}$ ). The  $^1\text{H}$  and  $^{13}\text{C}$  NMR spectra recorded with a Varian Mercury-300 or Varian 400-MR spectrometer at ambient temperature. The chemical shifts were reported in  $\delta$  units downfield from the internal reference ( $\text{Me}_4\text{Si}$ ). All coupling constants were recorded in Hz. Elementary analysis were measured on a Perkin-Elmer 2400 series II CHN analyzer.

### 1.2 Synthesis of triazole and triazolium salt

#### 1.2.1 Preparation of the 1-(2,6-xylyl)-4-phenyl-1,2,3-triazole.

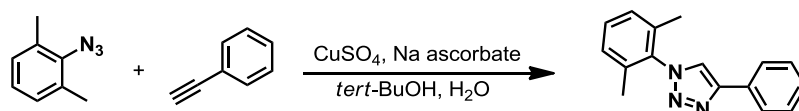

The mixture of Phenylacetylene (0.37 mL, 3.3 mmol), 2,6-xylylazido (450 mg, 3.1 mmol), sodium ascorbate (1450 mg, 3.6 mmol), anhydrous copper sulfate (579 mg, 3.6 mmol),  $\text{H}_2\text{O}$  (5.0 mL) and  $\text{tert-BuOH}$  (20 mL) were charged in a 100 mL round-bottomed flask. After stirring at room temperature for 43 h under air, the mixture was extracted with ethyl acetate, washed with conc.  $\text{NH}_4\text{Cl}$  aq. dried over  $\text{MgSO}_4$ , and the volatile was removed under reduced pressure. The residual solid was purified by silica gel chromatograph (eluted with hexane first, then with ethyl acetate) to yield the 1-(2,6-xylyl)-4-phenyl-1,2,3-triazole as a white solid (721 mg, 2.89 mmol, 93%).  $^1\text{H}$  NMR (300 MHz,  $\text{CDCl}_3$ )  $\delta$  7.94 (d,  $J = 7.0$  Hz, 2H, Ar), 7.87 (s, 1H, triazol C=CH), 7.5 (m, 2H, Ar), 7.4-7.3 (m, 2H, Ar) 7.21 (d,  $J = 7.7$  Hz, 2H, Ar), 2.07 (s, 6H, xylyl- $\text{CH}_3$ ).  $^{13}\text{C}$  NMR (75 MHz,  $\text{CDCl}_3$ )  $\delta$  147.6, 135.8, 135.4, 130.3, 130.0, 128.9, 128.4, 128.3, 125.7, 121.3 (s, Ar, triazole C=C), 17.3 (s, xylyl- $\text{CH}_3$ ). Anal. Calcd for  $\text{C}_{16}\text{H}_{15}\text{N}_3$ : C, 77.08; H, 6.06; N, 16.85. Found: C, 77.34; H, 6.04; N, 16.96%

#### 1.2.2 Preparation of the 1-(2-methyl phenyl)-4-phenyl-1,2,3-triazole.

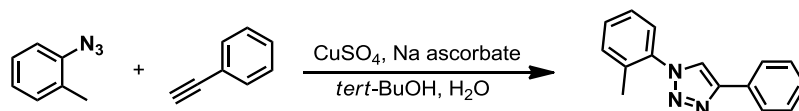

The mixture of Phenylacetylene (0.85 mL, 7.7 mmol), 2-methyl phenyl azido (1.02 g, 7.7 mmol), sodium ascorbate (153 mg, 0.77 mmol), copper sulfate pentahydrate (96.3 mg, 0.39 mmol),  $\text{H}_2\text{O}$  (11.0 mL) and  $\text{tert-BuOH}$  (11.0 mL) were charged in a 100 mL round-bottomed flask. After stirring at room temperature for overnight under air, the mixture was extracted with ethyl acetate, washed with conc.  $\text{NH}_4\text{Cl}$  aq. dried over  $\text{MgSO}_4$ , and the volatile was

removed under reduced pressure. The residual solid was purified by silica gel chromatograph (eluted with hexane first then with ethyl acetate) to yield the compound as a white solid (1.51 g, 6.42 mmol, 83%). The compound was prepared by modified method for previous report which have been synthesized this compound.<sup>2</sup> Spectroscopic data also was compared to data for previous report.<sup>5</sup>

### 1.2.3 Preparation of the triazolium salt **1b**

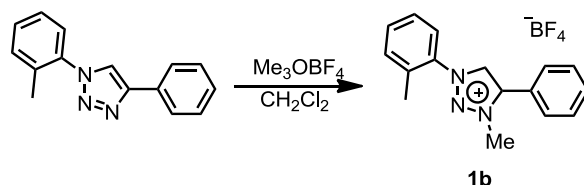

The mixture of 1-(2-methyl phenyl)-4-phenyl-1,2,3-triazole (186 mg, 0.79 mmol), Me<sub>3</sub>OBF<sub>4</sub> (159 mg, 1.03 mmol) and CH<sub>2</sub>Cl<sub>2</sub> (10 mL) were charged in a 50 mL Schlenk tube. After stirring at room temperature for overnight, the reaction was quenched with MeOH, and the volatile was removed under reduced pressure. The residual solid was washed with Et<sub>2</sub>O and dried to yield **1b** as a white solid (252 mg, 2.89 mmol, 95%). <sup>1</sup>H NMR (300 MHz, CDCl<sub>3</sub>) δ 8.35 (s, 1H, triazolium CH), 7.8-7.7 (m, 3H, Ar), 7.6 (m, 3H), 7.6-7.5 (m, 1H, Ar), 7.43 (dd, *J* = 6.3, 6.3 Hz, 2H, Ph), 4.39 (s, 3H, N-CH<sub>3</sub>), 2.38 (s, 3H, *o*-tolyl-CH<sub>3</sub>). <sup>13</sup>C NMR (75 MHz, (CD<sub>3</sub>)<sub>2</sub>SO) δ 142.7 (triazolium CH), 134.2, 133.4, 132.1, 131.7, 130.4, 129.5, 129.5, 127.6, 126.2, 122.6 (s, Ar, triazole), 39.0 (s, N-CH<sub>3</sub>), 17.0 (s, xylyl-CH<sub>3</sub>). Anal. Calcd for C<sub>16</sub>H<sub>16</sub>N<sub>3</sub>: C, 57.00; H, 4.78; N, 12.46. Found: C, 57.08; H, 4.75; N, 12.54%

### 1.2.4 Preparation of the triazolium salt **1c**

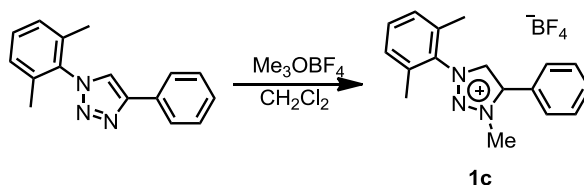

The mixture of 1-xylyl-4-phenyl 1,2,3-triazole (125 mg, 0.50 mmol), Me<sub>3</sub>OBF<sub>4</sub> (99.7 mg, 0.67 mmol) and CH<sub>2</sub>Cl<sub>2</sub> 10 mL were charged in a 50 mL Schlenk tube. After stirring at room temperature for overnight, the reaction was quenched with MeOH, and the volatile was removed under reduced pressure. The residual solid was washed with Et<sub>2</sub>O and dried to yield **1c** as a white solid (161 mg, 0.46 mmol, 92%). <sup>1</sup>H NMR (300 MHz, CDCl<sub>3</sub>) δ 8.33 (s, 1H, triazolium CH), 7.81 (dd, *J* = 6.7, 3.1 Hz, 2H, Ar), 7.7-7.6 (m, 3H, Ar), 7.48 (d, *J* = 8.0 Hz, 1H, Ar), 7.3 (m, 2H, Ar), 4.47 (s, 3H, N-CH<sub>3</sub>), 2.22 (s, 6H, xylyl-CH<sub>3</sub>). <sup>13</sup>C NMR (100 MHz, (CD<sub>3</sub>)<sub>2</sub>SO) δ 143.2 (s, triazolium CH), 134.9, 133.7, 132.0, 131.7, 130.9, 129.7, 129.4, 129.1, 122.7 (s, Ar, triazole), 39.1 (s, N-CH<sub>3</sub>), 16.9 (s, xylyl-CH<sub>3</sub>). Anal. Calcd for C<sub>17</sub>H<sub>18</sub>N<sub>3</sub>: C, 58.15; H, 5.17; N, 11.97. Found: C, 58.14; H, 5.06; N, 11.94%

### 1.3 Synthesis of ruthenium NHC complexes

#### 1.3.1 Synthesis of ruthenium complex 2a.

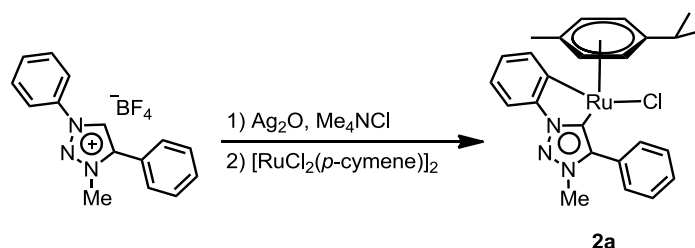

The mixture of a triazolium salt **1a** (171 mg, 0.53 mmol), Ag<sub>2</sub>O (74.3 mg, 0.32 mmol), Me<sub>4</sub>NCl (69.7 mg, 0.64 mmol) and CH<sub>2</sub>Cl<sub>2</sub>/CH<sub>3</sub>CN (1:1, 20 mL) were charged in a 50 mL Schlenk tube. After stirring at room temperature for 2 h, the volatile was removed under reduced pressure. The residual solid was extracted with CH<sub>2</sub>Cl<sub>2</sub> and filtered, and the volatile was removed under reduced pressure. To this residue, [RuCl<sub>2</sub>(*p*-cymene)]<sub>2</sub> (162 mg, 0.26 mmol) and CH<sub>2</sub>Cl<sub>2</sub> 15 mL were added. After stirring for 3h at room temperature, the volatile was concentrated in reduced pressure and purified by alumina column chromatography (CH<sub>2</sub>Cl<sub>2</sub>/acetone = 9/1) to yield **2a** as a yellow solid (142 mg, 0.28 mmol, 53%). Single crystals suitable for X-ray diffraction analysis were obtained by recrystallization from CH<sub>2</sub>Cl<sub>2</sub> and Et<sub>2</sub>O. <sup>1</sup>H NMR (400 MHz, CDCl<sub>3</sub>) δ 8.24 (dd, *J* = 7.4, 1.1 Hz, 1H, Ar), 7.9 (m, 2H, Ar), 7.6 (m, 4H, Ar), 7.12 (ddd, *J* = 7.4, 7.3, 1.4 Hz, 1H, Ar), 7.02 (ddd, *J* = 7.6, 7.5, 1.4 Hz, 1H, Ar), 5.26 (d, *J* = 7.0 Hz, *p*-cymene ring), 5.25 (d, *J* = 7.0 Hz, 1H, *p*-cymene ring), 4.83 (d, *J* = 5.8 Hz, 1H, *p*-cymene ring), 4.80 (d, *J* = 5.8 Hz, 1H, *p*-cymene ring), 4.11 (s, 3H, N-CH<sub>3</sub>), 2.14 (sep, 1H, *J* = 6.9 Hz, *p*-cymene-CH(CH<sub>3</sub>)<sub>2</sub>), 1.94 (s, 3H, *p*-cymene-CH<sub>3</sub>), 0.81 (d, *J* = 6.9 Hz, 3H, *p*-cymene-CH(CH<sub>3</sub>)<sub>2</sub>), 0.81 (d, *J* = 6.9 Hz, 3H, *p*-cymene-CH(CH<sub>3</sub>)<sub>2</sub>). <sup>13</sup>C NMR (100 MHz, CDCl<sub>3</sub>) δ 173.0 (s, Ru-C(Ar)), 166.3 (s, carbene carbon), 145.7, 144.9, 142.0, 130.6, 129.7, 128.9, 128.7, 127.4, 122.3, 113.8 (s, Ph, triazole), 102.1, 99.6, 89.7, 89.6, 88.4, 84.3 (s, *p*-cymene ring), 37.0, 30.9, 23.1, 21.5, 18.9 (s, *p*-cymene-CH<sub>3</sub>, *p*-cymene-CH(CH<sub>3</sub>)<sub>2</sub>, N-CH<sub>3</sub>). Anal. Calcd for C<sub>25</sub>H<sub>26</sub>ClN<sub>3</sub>Ru: C, 59.46; H, 5.19; N, 8.32. Found: C, 59.42; H, 5.11; N, 8.28%

#### 1.3.2 Synthesis of ruthenium complexes 2b.

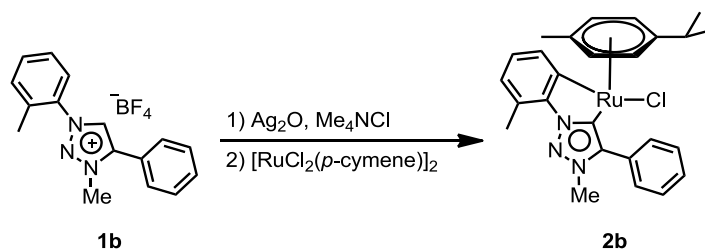

Complex **2b** was prepared from triazolium salt **1b** (80.7 mg, 0.24 mmol), Ag<sub>2</sub>O (33.9 mg, 0.15 mmol), Me<sub>4</sub>NCl (31.6 mg, 0.29 mmol) and [RuCl<sub>2</sub>(*p*-cymene)]<sub>2</sub> (73.9 mg, 0.12 mmol) in the same manner as that for **2a** except for purification method. Complex **2b** was isolated by recrystallization from CH<sub>2</sub>Cl<sub>2</sub>/Et<sub>2</sub>O as an orange solid (50.3 mg, 0.10 mmol, 40%). Single crystals suitable for X-ray diffraction analysis were obtained by recrystallization from 1,2-C<sub>2</sub>H<sub>4</sub>Cl<sub>2</sub> and Et<sub>2</sub>O. <sup>1</sup>H NMR (300 MHz, CDCl<sub>3</sub>) δ 8.13 (d, *J* = 6.9 Hz, 1H, *o*-tolyl), 7.9 (m, 2H, Ph), 7.6 (m, 3H,

Ph), 6.98 (dd, 1H,  $J = 7.4, 7.4$  Hz, *o*-tolyl), 6.80 (d,  $J = 7.2$  Hz, 1H, *o*-tolyl), 5.21 (s, 2H, *p*-cymene ring), 4.80 (d,  $J = 5.8$  Hz, 1H, *p*-cymene ring), 4.74 (d,  $J = 5.8$  Hz, 1H, *p*-cymene ring), 4.11 (s, 3H, N-CH<sub>3</sub>), 2.62 (s, 3H, *o*-tolyl-CH<sub>3</sub>), 2.12 (sep,  $J = 6.9$  Hz, 1H, *p*-cymene-CH(CH<sub>3</sub>)<sub>2</sub>), 1.92 (s, 3H, *p*-cymene-CH<sub>3</sub>), 0.80 (d,  $J = 6.9$  Hz, 3H, *p*-cymene-CH(CH<sub>3</sub>)<sub>2</sub>), 0.73 (d,  $J = 6.9$  Hz, 3H, *p*-cymene-CH(CH<sub>3</sub>)<sub>2</sub>). <sup>13</sup>C NMR (75 MHz, CDCl<sub>3</sub>) δ 174.2 (s, Ru-C(Ar)), 167.6 (s, carbene carbon), 144.5, 143.6, 139.7, 130.8, 129.6, 128.9, 128.8, 126.6, 126.1, 125.9 (s, Ar, triazole), 102.1, 99.5, 90.1, 88.6, 84.7 (s, *p*-cymene ring), 37.1, 30.8, 23.0, 21.5, 20.8, 18.9 (s, *p*-cymene-CH(CH<sub>3</sub>)<sub>2</sub>, *p*-cymene-CH(CH<sub>3</sub>)<sub>2</sub>, N-CH<sub>3</sub>, *o*-tolyl-CH<sub>3</sub>). Anal. Calcd for C<sub>26</sub>H<sub>28</sub>ClN<sub>3</sub>Ru·0.25CH<sub>2</sub>Cl<sub>2</sub>: C, 58.36; H, 5.32; N, 7.78. Found: C, 58.46; H, 5.21; N, 7.88%

### 1.3.3 Synthesis of ruthenium complexes 3c.

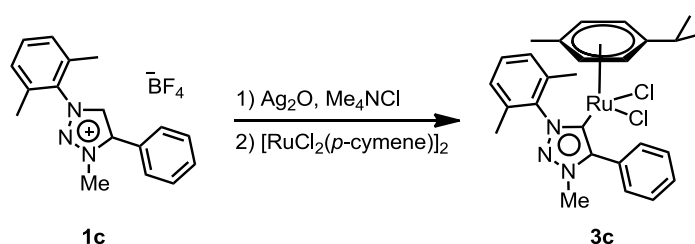

Complex **3c** was prepared from triazolium salt **1c** (231 mg, 0.66 mmol), Ag<sub>2</sub>O (92.6 mg, 0.40 mmol), Me<sub>4</sub>NCl (86.6 mg, 0.79 mmol) and [RuCl<sub>2</sub>(*p*-cymene)]<sub>2</sub> (203 mg, 0.33 mmol) in the same manner as that for **2b**. Complex **3c** was isolated as an orange solid (300 mg, 0.53 mmol, 80%). Single crystals suitable for X-ray diffraction analysis were obtained by recrystallization from CH<sub>2</sub>Cl<sub>2</sub> and Et<sub>2</sub>O. <sup>1</sup>H NMR (300 MHz, CDCl<sub>3</sub>) δ 8.0 (m, 2H, Ar), 7.6 (m, 3H, Ar), 7.23 (t,  $J = 7.5$  Hz, 1H, Ar), 7.05 (d,  $J = 7.5$  Hz, 2H, Ar), 5.13 (d,  $J = 5.9$  Hz, 2H, *p*-cymene ring), 4.22 (d, 2H,  $J = 5.9$  Hz, *p*-cymene ring), 3.97 (s, 3H, N-CH<sub>3</sub>), 2.85 (sep,  $J = 6.9$  Hz, 1H, *p*-cymene-CH(CH<sub>3</sub>)<sub>2</sub>), 1.80 (s, 3H, *p*-cymene-CH<sub>3</sub>), 1.16 (d,  $J = 6.9$  Hz, 6H, *p*-cymene-CH(CH<sub>3</sub>)<sub>2</sub>). <sup>13</sup>C NMR (300 MHz, CDCl<sub>3</sub>) δ 162.4 (s, carbene carbon), 147.7, 140.1, 135.4, 131.8, 130.1, 129.8, 129.3, 128.6, 127.3 (s, Ar, triazole), 106.6, 97.0, 88.6, 80.4 (*p*-cymene ring), 37.6, 30.3, 22.4, 18.5, 18.4 (s, *p*-cymene-CH(CH<sub>3</sub>)<sub>2</sub>, *p*-cymene-CH(CH<sub>3</sub>)<sub>2</sub>, N-CH<sub>3</sub>, xylyl). Anal. Calcd for C<sub>27</sub>H<sub>31</sub>Cl<sub>2</sub>N<sub>3</sub>Ru·1/3CH<sub>2</sub>Cl<sub>2</sub>: C, 54.91; H, 5.34; N, 7.03. Found: C, 54.63; H, 5.27; N, 6.99%

### 1.3.4 Synthesis of ruthenium complexes 3d.

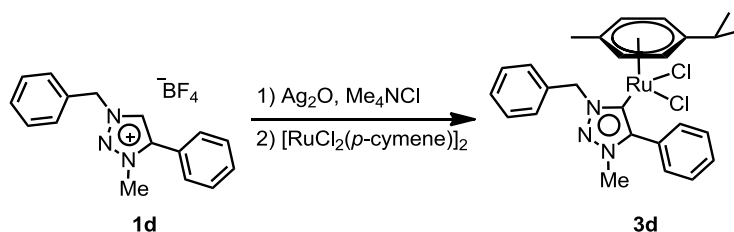

Complex **3d** was prepared from **1d** (186 mg, 0.55 mmol), Ag<sub>2</sub>O (77.3 mg, 0.33 mmol), Me<sub>4</sub>NCl (72.3 mg, 0.66 mmol) and [RuCl<sub>2</sub>(*p*-cymene)]<sub>2</sub> (169 mg, 0.28 mmol) in the same manner as that for **2b**. Complex **3d** was isolated as an orange solid (297 mg, 0.53 mmol, 97%). <sup>1</sup>H NMR (300 MHz, CDCl<sub>3</sub>) δ 7.72 (dd,  $J = 6.5, 3.1$  Hz, 2H, Ar), 7.5 (m, 3H, Ar), 7.4-7.3 (m, 5H, Ar), 6.28 (s, 2H, Bn-CH<sub>2</sub>), 5.13 (d,  $J = 6.0$  Hz, 2H, *p*-cymene ring), 4.74 (d,  $J = 6.0$

Hz, 2H, *p*-cymene ring), 3.74 (s, 3H, N-CH<sub>3</sub>), 2.47 (sep, *J* = 6.9 Hz, 1H, *p*-cymene-CH(CH<sub>3</sub>)<sub>2</sub>), 1.59 (s, 3H, *p*-cymene-CH<sub>3</sub>), 1.07 (d, *J* = 6.9 Hz, 6H, *p*-cymene-CH(CH<sub>3</sub>)<sub>2</sub>). <sup>13</sup>C NMR (75MHz, CDCl<sub>3</sub>) δ 161.3 (s, carbene carbon), 148.5, 136.4, 131.9, 129.7, 128.6, 128.5, 127.9 (s, Ar, triazole), 105.5, 96.4, 84.7, 83.2 (s, *p*-cymene ring), 57.1 (s, Bn-CH<sub>2</sub>), 37.1, 30.3, 22.4, 17.9 (s, *p*-cymene-CH<sub>3</sub>, *p*-cymene-CH(CH<sub>3</sub>)<sub>2</sub>, *p*-cymene-CH(CH<sub>3</sub>)<sub>2</sub>, N-CH<sub>3</sub>). Anal. Calcd for C<sub>26</sub>H<sub>29</sub>Cl<sub>2</sub>N<sub>3</sub>Ru·0.2CH<sub>2</sub>Cl<sub>2</sub>: C, 54.97; H, 5.18; N, 7.34. Found: C, 55.26; H, 5.25; N, 7.49%

### 1.3.5 Synthesis of ruthenium complexes 4c.

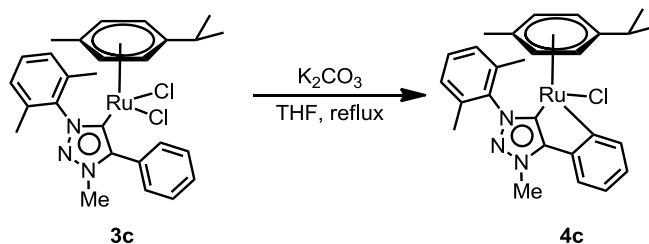

The mixture of the ruthenium complex **3c** (89.5 mg, 0.16 mmol), K<sub>2</sub>CO<sub>3</sub> (35.0 mg, 0.25 mmol) and THF 5 mL were charged in a 20 mL Schlenk tube. After stirring at reflux for 6 h, the volatile was removed under reduced pressure. The residual solid was extracted with CH<sub>2</sub>Cl<sub>2</sub> and filtered. The volatile was removed under reduced pressure and the residue was recrystallized (CH<sub>2</sub>Cl<sub>2</sub>/Et<sub>2</sub>O) to yield **4c** as a yellow solid (61.6 mg, 0.12 mmol, 75 %). <sup>1</sup>H NMR (300 MHz, CDCl<sub>3</sub>) δ 8.27 (d, *J* = 7.4, Hz, 1H, Ph), 7.47 (dd, *J* = 7.6, 7.6 Hz, 1H, Ph), 7.4-7.3 (m, 3H, xylyl), 7.06 (dd, *J* = 7.4, 7.2 Hz, 1H, Ph), 6.96 (dd, *J* = 7.6, 7.6 Hz, 1H, Ph), 5.53 (d, *J* = 6.0 Hz, 1H, *p*-cymene ring), 4.91 (d, 1H, *J* = 6.0 Hz, *p*-cymene ring), 4.55 (d, 1H, *J* = 5.5 Hz, *p*-cymene ring), 4.28 (d, 1H, *J* = 5.5 Hz, *p*-cymene ring), 4.27 (s, 3H, N-CH<sub>3</sub>), 2.39 (s, 3H, *p*-cymene-CH<sub>3</sub>), 2.30 (sep, *J* = 6.9 Hz, 1H, *p*-cymene-CH(CH<sub>3</sub>)<sub>2</sub>), 2.10 (s, 3H, xylyl-CH<sub>3</sub>), 1.82 (s, 3H, xylyl-CH<sub>3</sub>), 0.92 (d, *J* = 6.9 Hz, 3H, *p*-cymene-CH(CH<sub>3</sub>)<sub>2</sub>), 0.52 (d, *J* = 6.9 Hz, 3H, *p*-cymene-CH(CH<sub>3</sub>)<sub>2</sub>). <sup>13</sup>C NMR (300 MHz CDCl<sub>3</sub>) δ 180.8, 178.4 (s, Ru-C(Ar), carbene carbon), 152.9 (s, triazole), 142.2, 138.1, 137.9, 136.5, 135.2, 130.2, 128.9, 127.8, 127.4, 121.8, 120.8 (s, Ar), 100.9, 99.8, 93.6, 90.8, 89.5, 75.9 (s, *p*-cymene ring), 37.3, 30.6, 23.9, 20.7, 18.9, 18.4, 17.6 (s, *p*-cymene-CH(CH<sub>3</sub>)<sub>2</sub>, *p*-cymene-CH(CH<sub>3</sub>)<sub>2</sub>, xylyl, N-CH<sub>3</sub>). HR-MS (ESI) calcd for C<sub>27</sub>H<sub>30</sub>ClN<sub>3</sub>Ru [M+Na]<sup>+</sup> 556.1069, found 556.1068.

## 2. X-ray Crystallographic data

Crystal data for **2a**:  $C_{25}H_{26}ClN_3Ru$ ,  $M = 505.02$ , monoclinic,  $a = 7.9014(19)$ ,  $b = 23.660(6)$ ,  $c = 11.737(3)$  Å,  $V = 2187.0(9)$  Å<sup>3</sup>,  $T = 123$  K, space group  $P2_1/n$  (no. 14),  $Z = 4$ ,  $\mu(Mo-K\alpha) = 8.562$  cm<sup>-1</sup>, 16427 measured reflections, 4990 unique reflections.  $R1 = 0.0303$ ,  $wR2 = 0.0703$ , for 4550 reflections. For **2b**·CH<sub>2</sub>Cl<sub>2</sub>:  $C_{28}H_{32}Cl_3N_3Ru$ ,  $M = 618.01$ , monoclinic,  $a = 29.7166(6)$ ,  $b = 11.3579(2)$ ,  $c = 21.1834(4)$  Å,  $V = 5507(2)$  Å<sup>3</sup>,  $T = 198$  K, space group  $C2/c$  (no. 15),  $Z = 8$ ,  $\mu(Mo-K\alpha) = 8.822$  cm<sup>-1</sup>, 25744 measured reflections, 6277 unique reflections.  $R1 = 0.0365$ ,  $wR2 = 0.0917$ , for 5904 reflections. For **3c**·2CH<sub>2</sub>Cl<sub>2</sub>:  $C_{29}H_{35}Cl_6N_3Ru$ ,  $M = 739.40$ , monoclinic,  $a = 22.430(5)$ ,  $b = 13.091(3)$ ,  $c = 23.693(3)$  Å,  $V = 6449(3)$  Å<sup>3</sup>,  $T = 123$  K, space group  $P2_1/n$  (no. 14),  $Z = 8$ ,  $\mu(Mo-K\alpha) = 10.070$  cm<sup>-1</sup>, 48952 measured reflections, 14715 unique reflections.  $R1 = 0.0779$ ,  $wR2 = 0.2052$ , for 11198 reflections. For **4c**·CH<sub>2</sub>Cl<sub>2</sub>:  $C_{28}H_{32}Cl_3N_3Ru$ ,  $M = 618.01$ , monoclinic,  $a = 10.8748(3)$ ,  $b = 9.4047(2)$ ,  $c = 26.8586(6)$  Å,  $V = 2739.6(2)$  Å<sup>3</sup>,  $T = 198$  K, space group  $P2_1/n$  (no. 14),  $Z = 4$ ,  $\mu(Mo-K\alpha) = 8.867$  cm<sup>-1</sup>, 25313 measured reflections, 6266 unique reflections.  $R1 = 0.0302$ ,  $wR2 = 0.0541$ , for 5599 reflections. CCDC numbers: 901766 (**2a**), 901767 (**2b**), 901768 (**3c**) and 901934 (**4c**).

## 3. References

1. L. P. Spencer, R. Altwer, P. Wei, L. Gelmini, J. Gauld, D. W. Stephan, *Organometallics*, 2003, **22**, 3841.
2. H. Cheng, J. Wan, M.-I. Lin, Y. Liu, X. Lu, J. Liu, Y. Xu, J. Chen, Z. Tu, Y.-S. E. Cheng, K. Ding, *J. Med. Chem.* 2012, **55**, 2144.
3. T. Nakamura, T. Terashima, K. Ogata, S.-i. Fukuzawa, *Org. Lett.*, 2011, **13**, 620.
4. K. J. Kilpin, U. D. D. Paul, A.-L. Lee, J. D. Crowley, *Chem. Commun.*, 2011, **47**, 328.
5. C. Tao, X. Cui, J. Li, A.-X. Liu, L. Liu, Q.-X. Guo, *Tetrahedron Letters*, 2007, **48**, 3525.
